# Supplementary material
Source: MDPI journal article supplement (https://www.mdpi.com/2073-445X/7/4/159)
Supplement: s1 [file s1]

**Socio-Economic Profile of Claremont Local Government Area, Greater Perth Metropolitan Area, and Western Australia  
based on the 2016 Australian Census as reported by the Australian Bureau of Statistics**

[http://quickstats.censusdata.abs.gov.au/census\\_services/getproduct/census/2016/quickstat/LGA51750](http://quickstats.censusdata.abs.gov.au/census_services/getproduct/census/2016/quickstat/LGA51750)

[http://quickstats.censusdata.abs.gov.au/census\\_services/getproduct/census/2016/quickstat/5GPER?opendocument](http://quickstats.censusdata.abs.gov.au/census_services/getproduct/census/2016/quickstat/5GPER?opendocument)

**Table S1.** Social-Economic Overview – Community Profile.

| <b>Demographic Category</b>                                               | <b>Claremont<br/>Summary Data</b> | <b>Greater Perth<br/>Summary Data</b> | <b>Western Australia<br/>Summary Data</b> |
|---------------------------------------------------------------------------|-----------------------------------|---------------------------------------|-------------------------------------------|
| Median age                                                                | 43 years                          | 36 years                              | 36 years                                  |
| Median weekly personal income<br>persons over 15 years of age             | AU\$960                           | AU\$728                               | AU\$724                                   |
| Median weekly family income                                               | AU\$2,989                         | AU\$1,955                             | AU\$1,910                                 |
| Median weekly household income                                            | AU\$2,073                         | AU\$1,643                             | AU\$1,595                                 |
| Percentage of households with weekly<br>income of less than AU\$650       | 15.8%                             | 18.3%                                 | 20.0%                                     |
| Percentage of households with weekly<br>income of greater than AU\$3,0000 | 36.1%                             | 19.2%                                 | 16.4%                                     |
| Number of private dwellings                                               | 4,758                             | 818,081                               | 866,767                                   |
| Median monthly mortgage repayments                                        | \$2,600                           | \$2,000                               | \$1,993                                   |
| Median weekly rent                                                        | \$450                             | \$360                                 | \$347                                     |
| Average people per household                                              | 2.3 people                        | 2.6 people                            | 2.6 people                                |
| Number of families                                                        | 2,487                             | 515,328                               | 644,189                                   |
| Average children per family for<br>families with children                 | 1.8 children                      | 1.8 children                          | 1.9 children                              |
| Average children per family for all<br>families                           | 0.6 children                      | 0.8 children                          | 0.8 children                              |
| Average motor vehicles per dwelling                                       | 1.8                               | 1.9                                   | 2.6                                       |

**Table S2.** Social-Economic Overview – Household Composition.

| Demographic Category               | Claremont Statistical Area |        | Greater Perth |         | Western Australia |         |
|------------------------------------|----------------------------|--------|---------------|---------|-------------------|---------|
|                                    | %                          | Number | %             | Number  | %                 | Number  |
| Family households                  | 64.7                       | 2,477  | 73.0          | 503,642 | 72.7              | 629,882 |
| Single (or lone) person households | 31.0                       | 1,189  | 23.0          | 159,002 | 23.6              | 204,202 |
| Group households                   | 4.3                        | 164    | 4.0           | 27,644  | 3.8               | 32,692  |

**Table S3.** Social-Economic Overview – Family Composition.

| Demographic Category           | Claremont Statistical Area |        | Greater Perth |         | Western Australia |         |
|--------------------------------|----------------------------|--------|---------------|---------|-------------------|---------|
|                                | %                          | Number | %             | Number  | %                 | Number  |
| Couple family without children | 41.8                       | 1,038  | 37.5          | 193,034 | 38.5              | 247,841 |
| Couple family with children    | 43.3                       | 1,074  | 46.3          | 238,521 | 45.3              | 292,133 |
| One parent family              | 12.9                       | 320    | 14.5          | 74,556  | 14.5              | 93,344  |
| Other family                   | 2.1                        | 51     | 1.8           | 9,214   | 1.7               | 10,869  |

**Table S4.** Social-Economic Overview – Employment Status.

| Demographic Category | Claremont |        | Greater Perth |         | Western Australia |         |
|----------------------|-----------|--------|---------------|---------|-------------------|---------|
|                      | %         | Number | %             | Number  | %                 | Number  |
| Worked full-time     | 54.8      | 2,566  | 56.4          | 565,148 | 57.0              | 715,287 |
| Worked part-time     | 36.2      | 1,693  | 30.6          | 306,272 | 30.0              | 376,590 |
| Away from work       | 3.5       | 163    | 4.9           | 48,775  | 5.2               | 65,859  |
| Unemployed           | 5.5       | 257    | 8.1           | 81,482  | 7.8               | 97,966  |

Table S5. People – Gender Balance.

| Demographic Category | Claremont |        | Greater Perth |         | Western Australia |           |
|----------------------|-----------|--------|---------------|---------|-------------------|-----------|
|                      | %         | Number | %             | Number  | %                 | Number    |
| Female               | 51.5%     | 5,185  | 50.4          | 980,326 | 50.0              | 1,235,994 |
| Male                 | 48.5%     | 4,875  | 49.6          | 963,536 | 50.0              | 1,238,419 |

Table S6. People – Age Structure.

| Demographic Category | Claremont       |        | Greater Perth   |         | Western Australia |         |
|----------------------|-----------------|--------|-----------------|---------|-------------------|---------|
|                      | Median Age = 43 |        | Median Age = 36 |         | Median Age = 38   |         |
|                      | %               | Number | %               | Number  | %                 | Number  |
| 0-4 years            | 4.0             | 400    | 6.5             | 126,713 | 6.5               | 161,727 |
| 5-9 years            | 4.9             | 495    | 6.5             | 126,833 | 6.6               | 164,153 |
| 10-14 years          | 7.0             | 704    | 6.0             | 116,781 | 6.1               | 150,806 |
| 15-19 years          | 8.1             | 811    | 6.2             | 120,129 | 6.1               | 149,997 |
| 20-24 years          | 6.6             | 662    | 6.9             | 133,434 | 6.5               | 160,332 |
| 25-29 years          | 6.1             | 619    | 7.7             | 150,329 | 7.5               | 184,908 |
| 30-34 years          | 5.2             | 520    | 8.0             | 156,352 | 7.9               | 194,267 |
| 35-39 years          | 4.6             | 463    | 7.1             | 137,621 | 7.0               | 173,041 |
| 40-44 years          | 5.7             | 577    | 6.9             | 134,986 | 7.0               | 171,996 |
| 45-49 years          | 6.7             | 673    | 6.9             | 134,195 | 7.0               | 172,520 |
| 50-54 years          | 6.4             | 648    | 6.4             | 124,498 | 6.6               | 162,438 |
| 55-59 years          | 6.1             | 611    | 5.8             | 113,020 | 6.1               | 149,899 |
| 60-64 years          | 5.7             | 578    | 5.1             | 99,944  | 5.3               | 132,145 |
| 65-69 years          | 5.4             | 544    | 4.6             | 88,770  | 4.7               | 116,755 |
| 70-74 years          | 5.3             | 538    | 3.3             | 63,597  | 3.4               | 82,911  |
| 75-79 years          | 4.2             | 427    | 2.5             | 48,038  | 2.5               | 61,509  |
| 80-84 years          | 3.3             | 335    | 1.7             | 33,960  | 1.7               | 42,590  |
| 85 years and over    | 4.6             | 461    | 1.8             | 34,652  | 1.7               | 42,420  |

**Table S7.** People – Level of highest educational attainment for people aged 15 years and over.

| Demographic Category            | Claremont |        | Greater Perth |         | Western Australia |         |
|---------------------------------|-----------|--------|---------------|---------|-------------------|---------|
|                                 | %         | Number | %             | Number  | %                 | Number  |
| Bachelor Degree level and above | 46.1      | 3,896  | 22.9          | 360,855 | 20.5              | 410,272 |
| Advanced Diploma and Diploma    | 8.8       | 744    | 9.3           | 146,738 | 8.9               | 177,631 |
| Certificate level IV            | 0.9       | 76     | 3.1           | 48,401  | 3.1               | 62,656  |
| Certificate level III           | 3.7       | 316    | 13.2          | 207,925 | 14.0              | 279,448 |
| Year 12                         | 14.5      | 1,222  | 16.7          | 262,054 | 16.0              | 318,674 |
| Year 11                         | 3.5       | 296    | 5.1           | 80,533  | 5.4               | 107,858 |
| Year 10                         | 6.1       | 515    | 10.8          | 169,916 | 11.8              | 235,001 |
| Certificate level II            | 0.0       | 4      | 0.0           | 685     | 0.0               | 940     |
| Certificate level I             | 0.0       | 0      | 0.0           | 157     | 0.0               | 209     |
| Year 9 or below                 | 3.2       | 267    | 5.5           | 87,119  | 5.9               | 117,996 |
| No educational attainment       | 0.1       | 6      | 0.6           | 8,896   | 0.5               | 10,572  |
| Not stated                      | 10.8      | 917    | 9.9           | 155,841 | 11.0              | 220,701 |

**Table S8.** People – Currently attending an educational institution.

| Demographic Category               | Claremont |        | Greater Perth |         | Western Australia |         |
|------------------------------------|-----------|--------|---------------|---------|-------------------|---------|
|                                    | %         | Number | %             | Number  | %                 | Number  |
| Preschool                          | 2.7       | 95     | 3.9           | 23,779  | 3.9               | 30,247  |
| Primary - Government               | 10.7      | 375    | 18.4          | 111,571 | 18.9              | 144,988 |
| Primary - Catholic                 | 2.7       | 96     | 4.8           | 29,164  | 4.8               | 36,865  |
| Primary - other non-Government     | 6.2       | 218    | 3.9           | 23,411  | 3.7               | 28,046  |
| Secondary - Government             | 4.1       | 144    | 11.0          | 66,647  | 11.5              | 88,176  |
| Secondary - Catholic               | 3.5       | 122    | 4.7           | 28,459  | 4.4               | 34,065  |
| Secondary - other non-Government   | 20.3      | 713    | 5.0           | 30,367  | 4.5               | 34,773  |
| Technical or further education     | 2.9       | 101    | 6.3           | 38,142  | 6.1               | 46,835  |
| University or tertiary institution | 22.7      | 799    | 16.5          | 99,590  | 13.9              | 106,811 |
| Other                              | 1.4       | 50     | 2.6           | 16,011  | 2.4               | 18,547  |
| Not stated                         | 22.9      | 804    | 22.8          | 137,920 | 25.8              | 197,644 |

**Table S9.** People – Cultural and language diversity profile.

| Demographic Category                                               | Claremont |        | Greater Perth |           | Western Australia |           |
|--------------------------------------------------------------------|-----------|--------|---------------|-----------|-------------------|-----------|
|                                                                    | %         | Number | %             | Number    | %                 | Number    |
| People born in Australia                                           | 62.9      | 6,309  | 57.3          | 1,113,277 | 60.3              | 1,492,842 |
| People born in England                                             | 8.4       | 842    | 8.6           | 166,965   | 7.8               | 194,163   |
| People born in New Zealand                                         | 1.5       | 146    | 3.2           | 61,326    | 3.2               | 79,221    |
| People born in India                                               | NR        | NR     | 2.4           | 46,667    | 2.0               | 49,385    |
| People born in South Africa                                        | 2.2       | 216    | 1.8           | 35,262    | 1.7               | 41,008    |
| People born in Malaysia                                            | NR        | NR     | 1.5           | 28,224    | 1.2               | 29,126    |
| People born in China<br>(excludes SARs and Taiwan)                 | 1.8       | 181    | NR            | NR        | 1.1               | 27,081    |
| People born in USA                                                 | 1.2       | 118    | NR            | NR        | 1.2               | 9,301     |
| Both parents born in Australia                                     | 42.6      | 4,283  | 33.8          | 657,057   | 38.3              | 947,977   |
| Both parents born overseas                                         | 33.8      | 3,398  | 45.5          | 883,843   | 40.5              | 1,001,150 |
| Mother only born overseas                                          | 6.8       | 687    | 6.0           | 115,761   | 5.8               | 144,217   |
| Father only born overseas                                          | 8.6       | 861    | 7.7           | 149,159   | 7.5               | 184,890   |
| English only spoken at home                                        | 80.3      | 8,041  | 73.5          | 1,428,821 | 75.2              | 1,861,041 |
| Households where a language other<br>than English (LOTE) is spoken | 14.6      | 610    | 22.3          | 163,504   | 19.4              | 181,998   |
| LOTE households - Mandarin                                         | 2.0       | 203    | 2.3           | 45,658    | 1.9               | 47,840    |
| LOTE households - Italian                                          | 0.8       | 76     | 1.4           | 26,759    | 1.2               | 29,401    |
| LOTE households - Vietnamese                                       | NR        | NR     | 1.0           | 19,396    | 0.8               | 20,247    |
| LOTE households - Cantonese                                        | NR        | NR     | 1.0           | 18,830    | 0.8               | 19,339    |
| LOTE households - Arabic                                           | NR        | NR     | 0.7           | 13,733    | 0.6               | 14,132    |
| LOTE households - French                                           | 1.0       | 103    | NR            | NR        | 0.4               | 9,597     |
| LOTE households - Japanese                                         | 1.0       | 96     | NR            | NR        | 0.2               | 5,859     |
| LOTE households - German                                           | 0.7       | 67     | NR            | NR        | 0.4               | 9,320     |

**Table S10.** Dwellings – Dwelling Structure.

| Demographic Category                               | Claremont |        | Greater Perth |         | Western Australia |         |
|----------------------------------------------------|-----------|--------|---------------|---------|-------------------|---------|
|                                                    | %         | Number | %             | Number  | %                 | Number  |
| Separate house                                     | 52.9      | 2,019  | 76.9          | 530,833 | 79.1              | 685,824 |
| Semi-detached, row or terrace house, townhouse etc | 22.5      | 859    | 16.0          | 110,152 | 14.1              | 122,562 |
| Flat or apartment                                  | 24.0      | 915    | 6.6           | 45,418  | 5.7               | 49,086  |
| Other dwelling                                     | 0.1       | 3      | 0.3           | 2,245   | 0.7               | 6,314   |

**Table S11.** Dwellings – Number of Bedrooms.

| Demographic Category                    | Claremont |        | Greater Perth |         | Western Australia |         |
|-----------------------------------------|-----------|--------|---------------|---------|-------------------|---------|
|                                         | %         | Number | %             | Number  | %                 | Number  |
| None (includes bedsitters)              | 0.0       | 0      | 0.2           | 1,347   | 0.3               | 2,452   |
| 1 bedroom                               | 6.2       | 236    | 3.4           | 23,141  | 3.5               | 30,043  |
| 2 bedrooms                              | 25.8      | 989    | 12.2          | 84,552  | 12.3              | 107,035 |
| 3 bedrooms                              | 37.3      | 1,427  | 37.0          | 255,369 | 37.8              | 327,662 |
| 4 or more bedrooms                      | 29.2      | 1,116  | 45.2          | 312,296 | 44.0              | 381,319 |
| Number of bedrooms not stated           | 1.5       | 59     | 2.0           | 13,577  | 2.1               | 18,272  |
| Average number of bedrooms per dwelling | NA        | 3      | NA            | 3.3     | NA                | 3.3     |
| Average number of people per household  | NA        | 2.3    | NA            | 2.6     | NA                | 2.6     |
